# Supplementary material
Source: PubMed Central journal article supplement (PMC3396140)
Supplement: Supp_Data.pdf [file Supp_Data.pdf]

# Supplementary Data

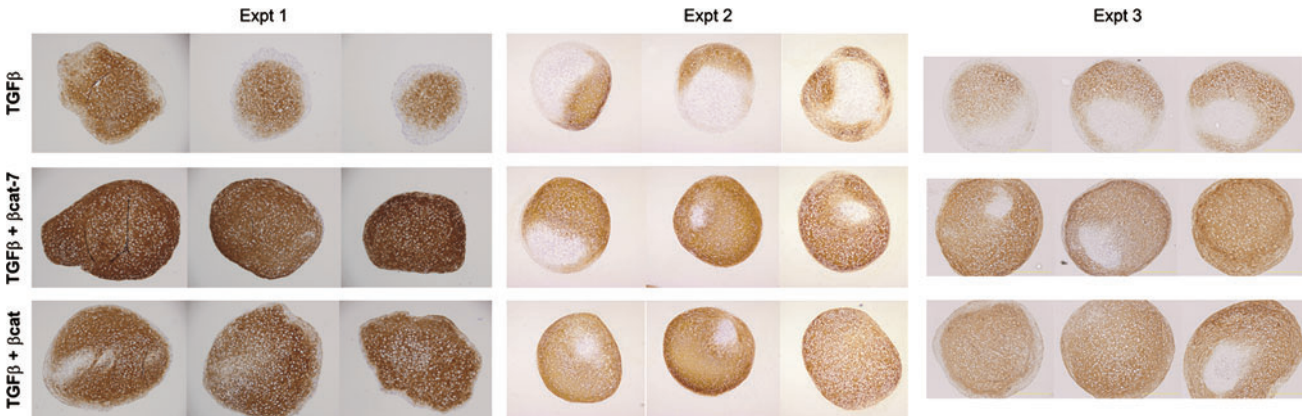

**SUPPLEMENTARY FIG. S1.** MSC pellets were subjected to chondrogenic differentiation in TGFβ, TGFβ with transient or continuous β-catenin co-activation. Pellets harvested at day 28 were sectioned and subjected to type II collagen immunohistochemistry staining. Micrographs of 9 pellets from 3 independent experiments (*n* = 3 per experiment) of 3 different donors' MSCs are shown. Images were taken at ×100 magnification. TGF, transforming growth factor; MSC, mesenchymal stem cell.

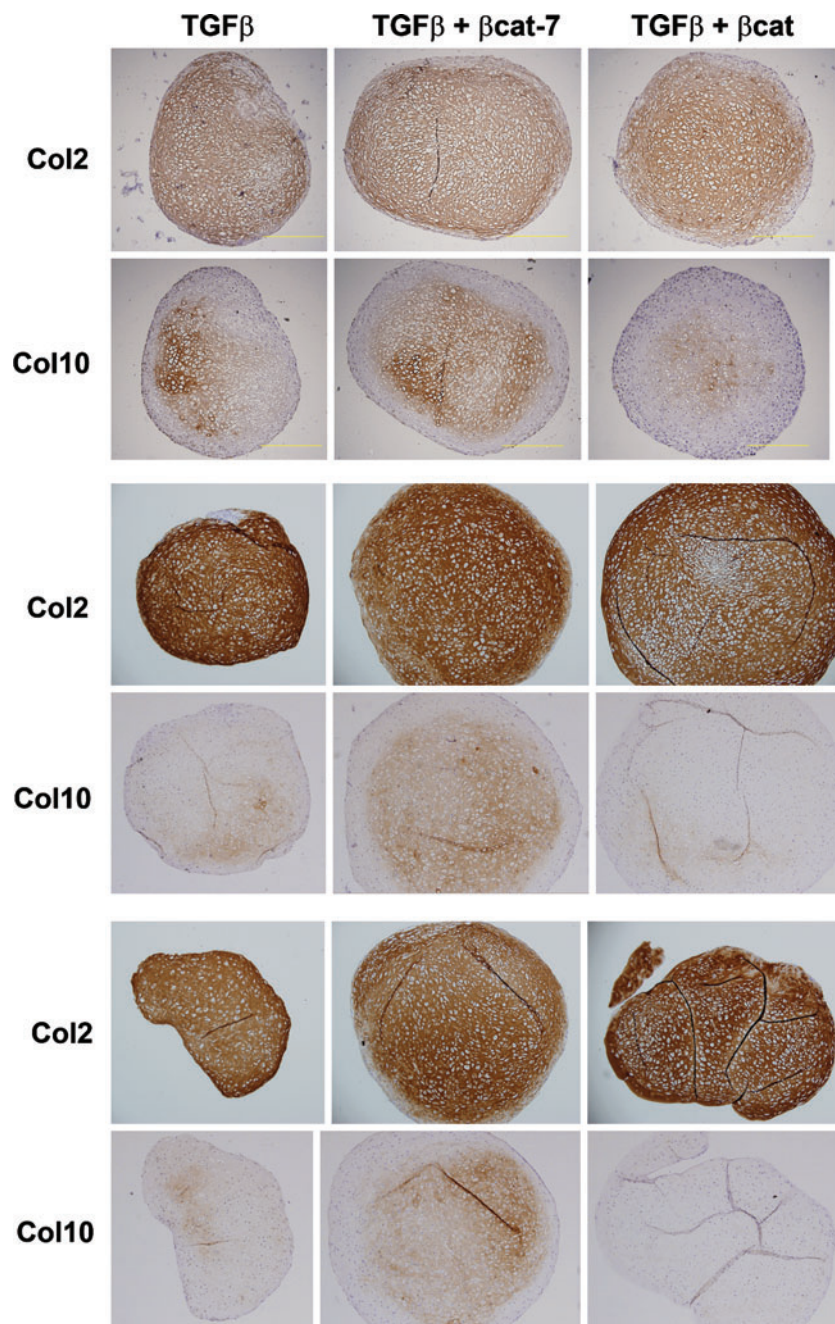

**SUPPLEMENTARY FIG. S2.** Characterization of hypertrophy development of cartilage pellets. MSC pellets were subjected to 35 days of chondrogenic differentiation in TGF $\beta$ , TGF $\beta$  with transient or continuous  $\beta$ -catenin coactivation. Three representative micrograms of sequential tissue slides immunostained for Type II and Type X collagen are shown.
